# Supplementary material for: Whole genomes from the extinct Xerces Blue butterfly can help identify declining insect species
Source: eLife. 2024 Oct 4;12:RP87928. doi: 10.7554/eLife.87928 (PMC11466284; doi:10.7554/eLife.87928)
Supplement: Supplementary file 1. — (a) DNA metric. (b) Mappability of the reference genomes. (c) Mitochondrial DNA genomes used in the phylogenetic analysis. (d) Heterozygosity, homozygosity, and runs of homozygosity (RoH). (e) Genes in uncovered genomic regions in Xerces Blue. [file elife-87928-supp1.xlsx]

## Sheet: A.Metrics
Sample_Name	nºSequencedSingleReads	nºSequencedPairedReads	nºCollapsedReads	nºNonCollapsedReads	%Reads Usable	nºReadsForMapping	Mapped_Reads	Unique_Reads	Q25Reads	nºQ25Bases	Average_Coverage	AvDepth*ItselfCov	AvDepth*MapableCov	%Covered_Positions	%Duplication	Mapping_Eficiency	%Damage_lastBase_3p	%Damage_lastBase_5p	MapppedMergedSeq	MappedSinglSeq	Mean_Collapsed_Read_Length	Mean_Non_Colapsed_Length	Normalized coverage in chrZ	Sex
L002	0	300294248	89624609	24909	29.8497	89649518	40729592	28190282	23337751	1178867089	1.9028	5.10545	3.26229	37.27	30.7867	45.432	0.0461898	0.0428709	23331949	5802	49.3207	61.176	1.04269	Male
L003	0	405198060	152123585	25541	37.5462	152149126	65811534	39092336	32547820	1547708463	2.4981	6.77727	4.28291	36.86	40.5996	43.2546	0.0435651	0.0422573	32541936	5884	46.3582	52.9029	0.775229	Female
L004	0	357165438	124477763	49188	34.8585	124526951	56601261	34507813	28722185	1572580252	2.5383	6.54707	4.35184	38.77	39.0335	45.453	0.0346046	0.0341285	28708469	13716	53.447	82.9231	1.01583	Male
L005	0	776312378	233032217	157155	30.028	233189372	148686847	67590908	56459037	3516904995	5.6766	12.4214	9.73235	45.7	54.5414	63.7623	0.0536661	0.052076	56410154	48883	61.7416	89.5984	1.0109	Male
L006	0	359520168	123855111	53968	34.4576	123909079	52899107	34547001	28498720	1533307799	2.4749	6.17644	4.24314	40.07	34.6927	42.6919	0.0416424	0.0412413	28487664	11056	52.7472	68.5231	1.02303	Male
L007	0	348916870	126999386	34632	36.4031	127034018	58002106	31953133	26758356	1338239452	2.16	6.20868	3.70325	34.79	44.9104	45.6587	0.0350223	0.0334451	26749178	9178	48.3449	61.838	1.00464	Male
L008	0	508120156	117861492	102700	23.2057	117964192	56033462	38637901	32107192	1935020964	3.1233	7.42229	5.3548	42.08	31.045	47.5004	0.0363198	0.0354275	32071376	35816	59.6037	98.1592	1.05392	Male
L009	0	322955384	144423602	31261	44.7242	144454863	75739566	46878387	39312617	2018084365	3.2574	8.02315	5.58471	40.6	38.1058	52.4313	0.0470151	0.0456972	39302919	9698	50.3159	56.7182	0.770022	Female
L011	0	236886534	87767307	29538	37.0566	87796845	41097017	29148930	24165282	1291123911	2.084	5.39896	3.57295	38.6	29.0729	46.8092	0.0461945	0.0452712	24157852	7430	52.0927	74.5667	1.05576	Male
L012	0	328359669	100459829	45881	30.6014	100505710	42029359	22679817	18683738	886738214	1.4313	4.28918	2.45392	33.37	46.0382	41.8179	0.0302712	0.0301785	18677188	6550	45.1727	56.3335	0.863545	Female
L013	0	385635644	277246705	12762746	73.5482	290009451	94630296	62000057	52612937	3596691043	5.8054	12.2996	9.95318	47.2	34.4818	32.6301	0.0303372	0.029594	52483463	129474	68.2809	107.15	1.07225	Male
RVcoll10-B005	0	96089618	43250496	9568824	49.9897	52819320	11722041	8782701	7238167	1071143351	1.7287	5.43104	2.9638	31.83	25.0753	22.1927	0.017	0.015	5932296	1305871	147.327	150.978	1.02	Male

## Sheet: B.Mappability
	Empiric	Simulated
All Xerces	49.28%	NAN
All Lygdamus	55.24%	NAN
All Species	57.83%	NAN
Ref. 30BP	NAN	46.9%
Ref. 40BP	NAN	52.55%
Ref. 50BP	NAN	56.56%
Ref. 60BP	NAN	59.65%
Ref. 70BP	NAN	62.17%
Ref. 80BP	NAN	64.3%
Ref. 90BP	NAN	66.16
Average Reference		58.3271%

## Sheet: C. Mitochondrial genomes
Specie	Assembly ID
Aricia agestis	LR990279.1
Aricia artaxerxes	OW569311.1
Celastrina argiolus	LR994603.1
Cyaniris semiargus	LR994570.1
Glaucopsyche alexis,	FR990065.1
Glaucopsyche xerces	MW677564.1
Lysandra bellargus	HG995365.1
Lysandra coridon	HG992145.1
Plebejus argus	MN974526.1
Plebejus melissa	DWQ001000057.1
Plebejus anna	DWTA01000073.1
Polyommatus icarus	OW569343.1
Shijimiaeoides divina	NC_029763.1
Zizina emelina	MN013031.1

## Sheet: D.Heterosygosity-ROHs
IND	Ka/Ki	Homozoygous High-Moderate	Heterozygous High-Moderate	RoHs
L002	0.395337	6460	11848	186
L003	0.445194	7827	13025	1399
L004	0.43814	5606	13095	167
L005	0.534656	6891	11176	1024
L006	0.402887	6656	13098	80
L007	0.445577	7849	12499	1244
L008	0.422681	5819	15465	113
L009	0.43752	7948	14533	1049
L011	0.408278	6255	13627	70
L012	0.36591	4567	13363	0
L013	0.42763	6198	15943	182

## Sheet: E. Genes in Uncovered Regions
Protein name	Sequence MD5 digest	Sequence length)	Analysis (e.g. Pfam / PRINTS / Gene3D)	Signature accession (e.g. PF09103 / G3DSA:2.40.50.140)	Signature description (e.g. BRCA2 repeat profile)	Start location	Stop location	Score - is the e-value (or score) of the match reported by member database method (e.g. 3.1E-52)	Status - is the status of the match (T: true)	Date - is the date of the run	InterPro annotations - accession (e.g. IPR002093)	InterPro annotations - description (e.g. BRCA2 repeat)	(GO annotations (e.g. GO:0005515) - optional column; only displayed if –goterms option is switched on)
g9932	1f9f54cc32e947e881922f76e2ad83e1	79	Phobius	TRANSMEMBRANE	Region of a membrane-bound protein predicted to be embedded in the membrane.	56	74	-	T	28-03-2022	-	-
g9932	1f9f54cc32e947e881922f76e2ad83e1	79	Phobius	CYTOPLASMIC_DOMAIN	Region of a membrane-bound protein predicted to be outside the membrane, in the cytoplasm.	75	79	-	T	28-03-2022	-	-
g9932	1f9f54cc32e947e881922f76e2ad83e1	79	Phobius	NON_CYTOPLASMIC_DOMAIN	Region of a membrane-bound protein predicted to be outside the membrane, in the extracellular region.	1	55	-	T	28-03-2022	-	-
g7166	8bfc047cbd175027c3266f236eff130f	1604	Gene3D	G3DSA:3.30.70.270	-	793	928	1.2e-78	T	28-03-2022	IPR043128	Reverse transcriptase/Diguanylate cyclase domain	-
g7166	8bfc047cbd175027c3266f236eff130f	1604	Gene3D	G3DSA:3.10.10.10	HIV Type 1 Reverse Transcriptase, subunit A, domain 1	719	853	1.2e-78	T	28-03-2022	-	-
g7166	8bfc047cbd175027c3266f236eff130f	1604	ProSiteProfiles	PS50878	Reverse transcriptase (RT) catalytic domain profile.	749	928	18.8996	T	28-03-2022	IPR000477	Reverse transcriptase domain	-
g7166	8bfc047cbd175027c3266f236eff130f	1604	CDD	cd00303	retropepsin_like	447	533	1.72727e-05	T	28-03-2022	-	-
g7166	8bfc047cbd175027c3266f236eff130f	1604	SUPERFAMILY	SSF56672	DNA/RNA polymerases	693	1128	3.56e-144	T	28-03-2022	IPR043502	DNA/RNA polymerase superfamily	-
g7166	8bfc047cbd175027c3266f236eff130f	1604	CDD	cd09274	RNase_HI_RT_Ty3	1022	1143	8.96402e-51	T	28-03-2022	-	-
g7166	8bfc047cbd175027c3266f236eff130f	1604	SUPERFAMILY	SSF57756	Retrovirus zinc finger-like domains	373	419	1.47e-08	T	28-03-2022	IPR036875	Zinc finger, CCHC-type superfamily	GO:0003676|GO:0008270
g7166	8bfc047cbd175027c3266f236eff130f	1604	Gene3D	G3DSA:1.10.340.70	-	1192	1276	6.9e-17	T	28-03-2022	-	-
g7166	8bfc047cbd175027c3266f236eff130f	1604	Pfam	PF17921	Integrase zinc binding domain	1222	1278	1.9e-16	T	28-03-2022	IPR041588	Integrase zinc-binding domain	-
g7166	8bfc047cbd175027c3266f236eff130f	1604	ProSiteProfiles	PS50994	Integrase catalytic domain profile.	1292	1451	25.0168	T	28-03-2022	IPR001584	Integrase, catalytic core	GO:0015074
g7166	8bfc047cbd175027c3266f236eff130f	1604	MobiDBLite	mobidb-lite	consensus disorder prediction	136	150	-	T	28-03-2022	-	-
g7166	8bfc047cbd175027c3266f236eff130f	1604	MobiDBLite	mobidb-lite	consensus disorder prediction	103	150	-	T	28-03-2022	-	-
g7166	8bfc047cbd175027c3266f236eff130f	1604	SMART	SM00343	c2hcfinal6	382	398	0.014	T	28-03-2022	IPR001878	Zinc finger, CCHC-type	GO:0003676|GO:0008270
g7166	8bfc047cbd175027c3266f236eff130f	1604	SMART	SM00343	c2hcfinal6	402	418	1.1	T	28-03-2022	IPR001878	Zinc finger, CCHC-type	GO:0003676|GO:0008270
g7166	8bfc047cbd175027c3266f236eff130f	1604	Gene3D	G3DSA:3.30.420.10	-	1287	1491	2.9e-48	T	28-03-2022	IPR036397	Ribonuclease H superfamily	GO:0003676
g7166	8bfc047cbd175027c3266f236eff130f	1604	MobiDBLite	mobidb-lite	consensus disorder prediction	65	79	-	T	28-03-2022	-	-
g7166	8bfc047cbd175027c3266f236eff130f	1604	Pfam	PF17919	RNase H-like domain found in reverse transcriptase	991	1091	1.2e-30	T	28-03-2022	IPR041577	Reverse transcriptase/retrotransposon-derived protein, RNase H-like domain	-
g7166	8bfc047cbd175027c3266f236eff130f	1604	Gene3D	G3DSA:2.40.70.10	Acid Proteases	443	555	4.6e-09	T	28-03-2022	IPR021109	Aspartic peptidase domain superfamily	-
g7166	8bfc047cbd175027c3266f236eff130f	1604	MobiDBLite	mobidb-lite	consensus disorder prediction	1582	1596	-	T	28-03-2022	-	-
g7166	8bfc047cbd175027c3266f236eff130f	1604	MobiDBLite	mobidb-lite	consensus disorder prediction	352	373	-	T	28-03-2022	-	-
g7166	8bfc047cbd175027c3266f236eff130f	1604	CDD	cd01647	RT_LTR	752	928	1.02688e-78	T	28-03-2022	-	-
g7166	8bfc047cbd175027c3266f236eff130f	1604	SUPERFAMILY	SSF53098	Ribonuclease H-like	1290	1445	5.31e-35	T	28-03-2022	IPR012337	Ribonuclease H-like superfamily	-
g7166	8bfc047cbd175027c3266f236eff130f	1604	MobiDBLite	mobidb-lite	consensus disorder prediction	1	90	-	T	28-03-2022	-	-
g7166	8bfc047cbd175027c3266f236eff130f	1604	PANTHER	PTHR34072	ENZYMATIC POLYPROTEIN-RELATED	189	1571	0	T	28-03-2022	-	-
g7166	8bfc047cbd175027c3266f236eff130f	1604	Gene3D	G3DSA:3.30.70.270	-	937	1028	1.6e-24	T	28-03-2022	IPR043128	Reverse transcriptase/Diguanylate cyclase domain	-
g7166	8bfc047cbd175027c3266f236eff130f	1604	SUPERFAMILY	SSF50630	Acid proteases	440	533	7.67e-07	T	28-03-2022	IPR021109	Aspartic peptidase domain superfamily	-
g7166	8bfc047cbd175027c3266f236eff130f	1604	MobiDBLite	mobidb-lite	consensus disorder prediction	1580	1604	-	T	28-03-2022	-	-
g7166	8bfc047cbd175027c3266f236eff130f	1604	Gene3D	G3DSA:4.10.60.10	-	357	426	1.1e-07	T	28-03-2022	-	-
g7166	8bfc047cbd175027c3266f236eff130f	1604	MobiDBLite	mobidb-lite	consensus disorder prediction	103	118	-	T	28-03-2022	-	-
g7166	8bfc047cbd175027c3266f236eff130f	1604	Pfam	PF00078	Reverse transcriptase (RNA-dependent DNA polymerase)	768	928	3.2e-28	T	28-03-2022	IPR000477	Reverse transcriptase domain	-
g7166	8bfc047cbd175027c3266f236eff130f	1604	PANTHER	PTHR34072:SF9	ENZYMATIC POLYPROTEIN-RELATED	189	1571	0	T	28-03-2022	-	-
g7166	8bfc047cbd175027c3266f236eff130f	1604	Pfam	PF00665	Integrase core domain	1295	1391	4.5e-15	T	28-03-2022	IPR001584	Integrase, catalytic core	GO:0015074
g7166	8bfc047cbd175027c3266f236eff130f	1604	ProSiteProfiles	PS50158	Zinc finger CCHC-type profile.	383	398	8.97692	T	28-03-2022	IPR001878	Zinc finger, CCHC-type	GO:0003676|GO:0008270
g7166	8bfc047cbd175027c3266f236eff130f	1604	Coils	Coil	Coil	83	110	-	T	28-03-2022	-	-
g5368	970137c1844928a2fe60106447767d69	85	MobiDBLite	mobidb-lite	consensus disorder prediction	1	28	-	T	28-03-2022	-	-
g4359	aec94c33f3f5add4f53796658447e686	213	MobiDBLite	mobidb-lite	consensus disorder prediction	1	20	-	T	28-03-2022	-	-
g4359	aec94c33f3f5add4f53796658447e686	213	MobiDBLite	mobidb-lite	consensus disorder prediction	124	148	-	T	28-03-2022	-	-
g394	9072558f0a7cbc86e4274464a2b614ce	306	Phobius	TRANSMEMBRANE	Region of a membrane-bound protein predicted to be embedded in the membrane.	234	261	-	T	28-03-2022	-	-
g394	9072558f0a7cbc86e4274464a2b614ce	306	Phobius	CYTOPLASMIC_DOMAIN	Region of a membrane-bound protein predicted to be outside the membrane, in the cytoplasm.	262	306	-	T	28-03-2022	-	-
g394	9072558f0a7cbc86e4274464a2b614ce	306	Phobius	NON_CYTOPLASMIC_DOMAIN	Region of a membrane-bound protein predicted to be outside the membrane, in the extracellular region.	95	233	-	T	28-03-2022	-	-
g394	9072558f0a7cbc86e4274464a2b614ce	306	TMHMM	TMhelix	Region of a membrane-bound protein predicted to be embedded in the membrane.	75	94	-	T	28-03-2022	-	-
g394	9072558f0a7cbc86e4274464a2b614ce	306	TMHMM	TMhelix	Region of a membrane-bound protein predicted to be embedded in the membrane.	239	261	-	T	28-03-2022	-	-
g394	9072558f0a7cbc86e4274464a2b614ce	306	Phobius	TRANSMEMBRANE	Region of a membrane-bound protein predicted to be embedded in the membrane.	75	94	-	T	28-03-2022	-	-
g394	9072558f0a7cbc86e4274464a2b614ce	306	Phobius	CYTOPLASMIC_DOMAIN	Region of a membrane-bound protein predicted to be outside the membrane, in the cytoplasm.	1	74	-	T	28-03-2022	-	-
g382	8a9e872cf1bb343b10b5f6c46a5e593e	578	Pfam	PF04583	Baculoviridae p74 conserved region	410	520	5.3e-07	T	28-03-2022	IPR007663	Baculoviridae p74	GO:0019058
g3138	aaeb3cbb3671876a9633f91e9874bb67	149	Pfam	PF05225	helix-turn-helix, Psq domain	11	43	1.1e-06	T	28-03-2022	IPR007889	DNA binding HTH domain, Psq-type	GO:0003677
g3138	aaeb3cbb3671876a9633f91e9874bb67	149	SUPERFAMILY	SSF46689	Homeodomain-like	4	57	4.66e-09	T	28-03-2022	IPR009057	Homeobox-like domain superfamily	-
g3138	aaeb3cbb3671876a9633f91e9874bb67	149	Gene3D	G3DSA:1.10.10.60	-	8	47	6.6e-10	T	28-03-2022	-	-
g22795	f79ba495eb915d4466f0104545c93cef	280	Gene3D	G3DSA:3.60.10.10	Endonuclease/exonuclease/phosphatase	41	246	1.1e-25	T	28-03-2022	IPR036691	Endonuclease/exonuclease/phosphatase superfamily	-
g22795	f79ba495eb915d4466f0104545c93cef	280	SUPERFAMILY	SSF56219	DNase I-like	42	245	1.2e-21	T	28-03-2022	IPR036691	Endonuclease/exonuclease/phosphatase superfamily	-
g22795	f79ba495eb915d4466f0104545c93cef	280	PANTHER	PTHR36191	-	11	245	1.6e-12	T	28-03-2022	-	-
g22652	b928ceacf5c5ab1c32c683a1c0224301	669	ProSiteProfiles	PS50175	Aspartyl protease, retroviral-type family profile.	335	371	8.78633	T	28-03-2022	IPR001995	Peptidase A2A, retrovirus, catalytic	GO:0004190|GO:0006508
g22652	b928ceacf5c5ab1c32c683a1c0224301	669	Gene3D	G3DSA:2.40.70.10	Acid Proteases	302	412	3.3e-05	T	28-03-2022	IPR021109	Aspartic peptidase domain superfamily	-
g22652	b928ceacf5c5ab1c32c683a1c0224301	669	Pfam	PF05585	Putative peptidase (DUF1758)	327	475	1e-13	T	28-03-2022	IPR008737	Peptidase aspartic, putative	-
g22652	b928ceacf5c5ab1c32c683a1c0224301	669	SUPERFAMILY	SSF56672	DNA/RNA polymerases	566	668	1.07e-05	T	28-03-2022	IPR043502	DNA/RNA polymerase superfamily	-
g22652	b928ceacf5c5ab1c32c683a1c0224301	669	Pfam	PF03564	Protein of unknown function (DUF1759)	2	114	3e-23	T	28-03-2022	IPR005312	Protein of unknown function DUF1759	-
g22652	b928ceacf5c5ab1c32c683a1c0224301	669	PANTHER	PTHR22955:SF62	-	1	668	1.5e-87	T	28-03-2022	-	-
g22652	b928ceacf5c5ab1c32c683a1c0224301	669	PANTHER	PTHR22955	RETROTRANSPOSON	1	668	1.5e-87	T	28-03-2022	-	-
g19858	d974ac5f39336b94ca649130f31b4f3c	349	MobiDBLite	mobidb-lite	consensus disorder prediction	1	68	-	T	28-03-2022	-	-
g19858	d974ac5f39336b94ca649130f31b4f3c	349	PANTHER	PTHR34072	ENZYMATIC POLYPROTEIN-RELATED	158	336	2.5e-27	T	28-03-2022	-	-
g19858	d974ac5f39336b94ca649130f31b4f3c	349	MobiDBLite	mobidb-lite	consensus disorder prediction	82	132	-	T	28-03-2022	-	-
g19858	d974ac5f39336b94ca649130f31b4f3c	349	Coils	Coil	Coil	57	91	-	T	28-03-2022	-	-
g19858	d974ac5f39336b94ca649130f31b4f3c	349	MobiDBLite	mobidb-lite	consensus disorder prediction	82	99	-	T	28-03-2022	-	-
g19858	d974ac5f39336b94ca649130f31b4f3c	349	MobiDBLite	mobidb-lite	consensus disorder prediction	325	349	-	T	28-03-2022	-	-
g18045	9d68c2c049e57be506e2ddd31982fe2e	139	MobiDBLite	mobidb-lite	consensus disorder prediction	116	139	-	T	28-03-2022	-	-
g17973	04a92dfcfd1924567446279736e85bae	170	PANTHER	PTHR22955	RETROTRANSPOSON	8	151	2.8e-39	T	28-03-2022	-	-
g17973	04a92dfcfd1924567446279736e85bae	170	Pfam	PF05380	Pao retrotransposon peptidase	8	90	1.4e-26	T	28-03-2022	IPR008042	Retrotransposon, Pao	-
g17973	04a92dfcfd1924567446279736e85bae	170	PANTHER	PTHR22955:SF60	PROTEIN CBG26950	8	151	2.8e-39	T	28-03-2022	-	-
g17574	23e69d40302c5e2d14da47a9ab795fab	468	Phobius	CYTOPLASMIC_DOMAIN	Region of a membrane-bound protein predicted to be outside the membrane, in the cytoplasm.	372	468	-	T	28-03-2022	-	-
g17574	23e69d40302c5e2d14da47a9ab795fab	468	TMHMM	TMhelix	Region of a membrane-bound protein predicted to be embedded in the membrane.	352	374	-	T	28-03-2022	-	-
g17574	23e69d40302c5e2d14da47a9ab795fab	468	Phobius	NON_CYTOPLASMIC_DOMAIN	Region of a membrane-bound protein predicted to be outside the membrane, in the extracellular region.	1	348	-	T	28-03-2022	-	-
g17574	23e69d40302c5e2d14da47a9ab795fab	468	Phobius	TRANSMEMBRANE	Region of a membrane-bound protein predicted to be embedded in the membrane.	349	371	-	T	28-03-2022	-	-
g17574	23e69d40302c5e2d14da47a9ab795fab	468	Pfam	PF12259	Baculovirus F protein	43	310	6.1e-20	T	28-03-2022	IPR022048	Envelope fusion protein-like	-
g17574	23e69d40302c5e2d14da47a9ab795fab	468	Coils	Coil	Coil	319	339	-	T	28-03-2022	-	-
g16366	28f7f28d0aca110d97288cc45f2cb45c	644	Coils	Coil	Coil	299	319	-	T	28-03-2022	-	-
g16366	28f7f28d0aca110d97288cc45f2cb45c	644	Coils	Coil	Coil	488	508	-	T	28-03-2022	-	-
g12519	ecb2e7852e463df35e2a5f66ef4dad20	70	MobiDBLite	mobidb-lite	consensus disorder prediction	33	63	-	T	28-03-2022	-	-
g12519	ecb2e7852e463df35e2a5f66ef4dad20	70	MobiDBLite	mobidb-lite	consensus disorder prediction	33	70	-	T	28-03-2022	-	-
g10260	550af8a0ba0fa9fb092b364c4ecca02f	173	MobiDBLite	mobidb-lite	consensus disorder prediction	1	31	-	T	28-03-2022	-	-
g10223	4d0c3f3824fd9306e36f9c410a0dd496	187	Pfam	PF16087	Helix-turn-helix domain (DUF4817)	5	61	1e-14	T	28-03-2022	IPR032135	Helix-turn-helix domain (DUF4817)	-
g10223	4d0c3f3824fd9306e36f9c410a0dd496	187	PANTHER	PTHR47326	TRANSPOSABLE ELEMENT TC3 TRANSPOSASE-LIKE PROTEIN	5	152	4.5e-16	T	28-03-2022	-	-
g10181	41829171e3659ad90b74e90d1a201107	109	Gene3D	G3DSA:2.40.70.10	Acid Proteases	4	96	1.6e-06	T	28-03-2022	IPR021109	Aspartic peptidase domain superfamily	-
g10179	64dd00a77eb224faa3bf60b71cba47f4	662	Gene3D	G3DSA:1.10.340.70	-	336	431	1.5e-18	T	28-03-2022	-	-
g10179	64dd00a77eb224faa3bf60b71cba47f4	662	Gene3D	G3DSA:3.30.70.270	-	1	88	4.2e-30	T	28-03-2022	IPR043128	Reverse transcriptase/Diguanylate cyclase domain	-
g10179	64dd00a77eb224faa3bf60b71cba47f4	662	CDD	cd01647	RT_LTR	1	81	1.53285e-33	T	28-03-2022	-	-
g10179	64dd00a77eb224faa3bf60b71cba47f4	662	Gene3D	G3DSA:3.30.420.10	-	442	537	6.2e-16	T	28-03-2022	IPR036397	Ribonuclease H superfamily	GO:0003676
g10179	64dd00a77eb224faa3bf60b71cba47f4	662	Pfam	PF00078	Reverse transcriptase (RNA-dependent DNA polymerase)	1	80	1.6e-17	T	28-03-2022	IPR000477	Reverse transcriptase domain	-
g10179	64dd00a77eb224faa3bf60b71cba47f4	662	ProSiteProfiles	PS50994	Integrase catalytic domain profile.	434	545	9.5316	T	28-03-2022	IPR001584	Integrase, catalytic core	GO:0015074
g10179	64dd00a77eb224faa3bf60b71cba47f4	662	PANTHER	PTHR34072:SF9	ENZYMATIC POLYPROTEIN-RELATED	1	518	7.4e-76	T	28-03-2022	-	-
g10179	64dd00a77eb224faa3bf60b71cba47f4	662	Gene3D	G3DSA:3.30.70.270	-	92	171	1.5e-20	T	28-03-2022	IPR043128	Reverse transcriptase/Diguanylate cyclase domain	-
g10179	64dd00a77eb224faa3bf60b71cba47f4	662	SUPERFAMILY	SSF53098	Ribonuclease H-like	450	519	2.28e-11	T	28-03-2022	IPR012337	Ribonuclease H-like superfamily	-
g10179	64dd00a77eb224faa3bf60b71cba47f4	662	MobiDBLite	mobidb-lite	consensus disorder prediction	621	662	-	T	28-03-2022	-	-
g10179	64dd00a77eb224faa3bf60b71cba47f4	662	SUPERFAMILY	SSF56672	DNA/RNA polymerases	1	277	9.56e-93	T	28-03-2022	IPR043502	DNA/RNA polymerase superfamily	-
g10179	64dd00a77eb224faa3bf60b71cba47f4	662	ProSiteProfiles	PS50878	Reverse transcriptase (RT) catalytic domain profile.	1	82	11.807	T	28-03-2022	IPR000477	Reverse transcriptase domain	-
g10179	64dd00a77eb224faa3bf60b71cba47f4	662	Pfam	PF17917	RNase H-like domain found in reverse transcriptase	168	271	1.2e-35	T	28-03-2022	IPR041373	Reverse transcriptase, RNase H-like domain	-
g10179	64dd00a77eb224faa3bf60b71cba47f4	662	PANTHER	PTHR34072	ENZYMATIC POLYPROTEIN-RELATED	1	518	7.4e-76	T	28-03-2022	-	-
g10179	64dd00a77eb224faa3bf60b71cba47f4	662	Gene3D	G3DSA:3.10.20.370	-	172	242	2.3e-06	T	28-03-2022	-	-
g10179	64dd00a77eb224faa3bf60b71cba47f4	662	CDD	cd09274	RNase_HI_RT_Ty3	174	293	4.24973e-56	T	28-03-2022	-	-
g10179	64dd00a77eb224faa3bf60b71cba47f4	662	MobiDBLite	mobidb-lite	consensus disorder prediction	640	662	-	T	28-03-2022	-	-
g10179	64dd00a77eb224faa3bf60b71cba47f4	662	Pfam	PF17921	Integrase zinc binding domain	375	433	2.9e-20	T	28-03-2022	IPR041588	Integrase zinc-binding domain	-
